# Supplementary material
Source: publisher figshare collection journal article supplement (https://gsajournals.figshare.com/ndownloader/files/21524739)
Supplement: Supplementary file 1 [file 21524739]

## Sheet: Table S3_Anth Response RIL
	Table S3 Antracnose resistance response of RIL derived from the crossing of SC112-14 and PI609251
	RIL	Florida	Isabela	Texas	Tifton
	RIL_SC112_001	3.5	3.9749	3.5	4
	RIL_SC112_002	4	4.5	3	4.5
	RIL_SC112_003	4	4	3.5	4.5
	RIL_SC112_004	2	2	2	2
	RIL_SC112_006	4.5	4.5	3.5	5
	RIL_SC112_007	2	2.9749	2	3
	RIL_SC112_008	5	4	3.5	5
	RIL_SC112_009	5	4.5	3	5
	RIL_SC112_010	5	4.5	4	5
	RIL_SC112_011	3.5	5	3	4
	RIL_SC112_012	3.5	5	3.5	4
	RIL_SC112_013	2.5	5	3	3
	RIL_SC112_014	3.5	4.0251	2.9813	2.5
	RIL_SC112_015	3	2	2.5	2
	RIL_SC112_016B	2	2	2	2
	RIL_SC112_017	3.5	5.0251	3	3.5
	RIL_SC112_018	2	4.9749	3	2.5
	RIL_SC112_019	5	5	3.5	4.5
	RIL_SC112_020	5	5	3.5	5
	RIL_SC112_021	2	2	2	3
	RIL_SC112_022	2	2	2	2
	RIL_SC112_023	3.5	2	2	3
	RIL_SC112_026	2	2.5	2.5	2
	RIL_SC112_027	.	5	3	.
	RIL_SC112_028	.	.	2.5	.
	RIL_SC112_030	3.5	2.0251	2.5	3
	RIL_SC112_032	2	1.9749	2	2
	RIL_SC112_033	2	2	2	2.5
	RIL_SC112_034	4.5	5	3	4
	RIL_SC112_035	2	4.5	2	2
	RIL_SC112_038	3.5	5	3	4
	RIL_SC112_039	2	2	2	2
	RIL_SC112_041	2	3.5	4	2
	RIL_SC112_043	5	4.5	2	4.5
	RIL_SC112_044	2	3	2	2
	RIL_SC112_045	2	2.5	2	3
	RIL_SC112_047	2.5	2	3.5	2
	RIL_SC112_049	4	5	2.5	4
	RIL_SC112_050	2	4	1.9813	5
	RIL_SC112_051	2	2	.	2
	RIL_SC112_052	2	4.5	2.0187	2
	RIL_SC112_053	3	2.9749	2	4
	RIL_SC112_054	4.5	5	4.9813	5
	RIL_SC112_055	2	2	2	2
	RIL_SC112_056	2	2	2	2
	RIL_SC112_057	5	5	3	5
	RIL_SC112_058	4	5.0251	1.9813	2.5
	RIL_SC112_059	4.5	5	3	4
	RIL_SC112_060	2	2	2	3
	RIL_SC112_061	2	3	2	2
	RIL_SC112_063	3	2	2	2
	RIL_SC112_064	3.5	2.5	2.5	2.5
	RIL_SC112_065	3.5	2	2	2
	RIL_SC112_066	2.5	3.5	2	2
	RIL_SC112_067	5	5	2.5	4.5
	RIL_SC112_068	2	3.5	2	2
	RIL_SC112_070	.	.	2.9813	.
	RIL_SC112_071	3	5	3	3.5
	RIL_SC112_072	4	3	4	3
	RIL_SC112_074	3.5	3.5	3.5	3.5
	RIL_SC112_076	4.5	5	.	3
	RIL_SC112_078	2	2	2	2
	RIL_SC112_079	.	5	3	.
	RIL_SC112_080	2.5	2	2	2
	RIL_SC112_081	.	1.9749	.	.
	RIL_SC112_082	2	2	2	2
	RIL_SC112_085	2.5	4.0251	2	2
	RIL_SC112_086	5	3.9749	3	4
	RIL_SC112_087	5	1.9749	4	5
	RIL_SC112_088	2	4	2.5	3
	RIL_SC112_089	.	.	2	.
	RIL_SC112_090	4	3.5	2.9813	3.5
	RIL_SC112_091	2	2	2	2
	RIL_SC112_092	3.5	4.5	4	4.5
	RIL_SC112_095	2	4	2	2
	RIL_SC112_097	3	2.0251	2	2
	RIL_SC112_098	.	2	.	.
	RIL_SC112_099	5	5	3.5	5
	RIL_SC112_100	5	4.5	3	5
	RIL_SC112_101	2	3	2	2
	RIL_SC112_102	2	.	2.5	2
	RIL_SC112_103	2	2	2	2
	RIL_SC112_104	.	5	.	.
	RIL_SC112_105	2	2	3	2
	RIL_SC112_106	4.5	4	3	4.5
	RIL_SC112_107	2.0562	4	2.0187	2
	RIL_SC112_108	2	3	.	2
	RIL_SC112_109	2	2.0251	3	3
	RIL_SC112_111	2	2	2	2
	RIL_SC112_112	3.5	4.9749	3	4
	RIL_SC112_113	2	2	2	2
	RIL_SC112_114	5	5	2.9813	5
	RIL_SC112_116	4	.	3	3.5
	RIL_SC112_117	4	5	4	5
	RIL_SC112_118	4.5	3.5	4	4.5
	RIL_SC112_119	4.5	4	2.5	3
	RIL_SC112_120	4.5	4.5	2.5	4.5
	RIL_SC112_123	4.5	5	4.5	4.5
	RIL_SC112_124	2	3	2	2
	RIL_SC112_125	2	3	1.9813	4.5
	RIL_SC112_126	4	4.9749	3	4
	RIL_SC112_127	5	5	3	5
	RIL_SC112_128	2.5	.	2.5	4
	RIL_SC112_131	2	2	2	2.5
	RIL_SC112_132	3	2	2	2.5
	RIL_SC112_133	3.5	5.0251	3	3
	RIL_SC112_135	2	2	2	2
	RIL_SC112_136	3	4.9749	2.9813	3.5
	RIL_SC112_137	2.5	4.5	3	4
	RIL_SC112_138	4	3	3	2.5
	RIL_SC112_139	2	2.5	2	2
	RIL_SC112_140	2.5	3.5	2	2
	RIL_SC112_141	3	4.5	3	2.5
	RIL_SC112_142	3	5	3	3.5
